# Supplementary material for: Large-scale preparation of Sb 3+ -activated hybrid metal halides with efficient tunable emission from visible to near-infrared regions for advanced photonic applications
Source: Royal Society of Chemistry journal article supplement (doi:10.1039/d4mh01197j), 2024-12-02
Supplement: d4mh01197j1.pdf [file d4mh01197j1.pdf]

## Supporting Information

### **Large-Scale Preparation of Sb<sup>3+</sup>-Activated Hybrid Metal Halides with Efficient Tunable Emission from Visible to Near-Infrared Regions for Advanced Photonics Applications**

Ou Xu,<sup>†</sup> Hui Peng,<sup>†\*</sup> Qilin Wei,<sup>‡</sup> Linghang Kong,<sup>†</sup> Xiao Wang,<sup>†</sup> Heng Zhang,<sup>†</sup> Jialong Zhao,<sup>†</sup>  
Bingsuo Zou<sup>†</sup>

<sup>†</sup>State Key Laboratory of Featured Metal Materials and Life-cycle Safety for Composite Structures,  
MOE Key Laboratory of New Processing Technology for Nonferrous Metals and Materials, and  
School of Resources, Environment and Materials, Guangxi University, Nanning 530004, China.

<sup>‡</sup>School of Chemistry and Chemical Engineering, Shandong University, Jinan 250100, China.

Corresponding author: E-mail: penghuimaterial@163.com

## Experimental methods

**Chemicals:** Cadmium chloride ( $\text{CdCl}_2$ , 98%), cadmium bromide ( $\text{CdBr}_2$ , 98%), tetrapropylamine chloride ( $\text{C}_{12}\text{H}_{28}\text{NCl}$ , 98%), tetrapropylamine bromide ( $\text{C}_{12}\text{H}_{28}\text{NBr}$ , 98%), ethyl ether ( $\text{Et}_2\text{O}$ , 99.5%), N, N-Dimethylformamide (DMF, 99.5%), and ethanol ( $\text{EtOH}$ , 99.5%) were purchased from Sigma-Aldrich. Antimony(III) chloride ( $\text{SbCl}_3$ , 99%) and antimony(III) bromide ( $\text{SbBr}_3$ , 99.5%) were purchased from Alfa reagent. All materials were used without further processing.

**Large-scale preparation of  $\text{Sb}^{3+}$ -doped  $(\text{C}_{12}\text{H}_{28}\text{N})_2\text{CdX}_4$  phosphors:** 40 mmol  $\text{C}_{12}\text{H}_{28}\text{NCl}$ , 20 mmol  $\text{CdCl}_2$ , and 3 mmol  $\text{SbCl}_3$  were dissolved in 40 mL DMF solution. Afterwards,  $\text{Et}_2\text{O}$  was dropped into the above solution, and  $\text{Sb}^{3+}$ -doped  $(\text{C}_{12}\text{H}_{28}\text{N})_2\text{CdCl}_4$  phosphors can be obtained quickly. For synthesizing  $\text{Sb}^{3+}$ -doped  $(\text{C}_{12}\text{H}_{28}\text{N})_2\text{CdBr}_4$  phosphors, only 30 mmol  $\text{C}_{12}\text{H}_{28}\text{NBr}$ , 15 mmol  $\text{CdBr}_2$ , and 3.75 mmol  $\text{SbBr}_3$  were used under otherwise identical conditions. Particularly, the yield of both  $\text{Sb}^{3+}$ -doped phosphors exceeds 80% based on the total Cd and Sb contents.

**Preparation of  $\text{Sb}^{3+}$ -doped  $(\text{C}_{12}\text{H}_{28}\text{N})_2\text{CdCl}_x\text{Br}_{4-x}$  ( $x = 0 - 4$ ) phosphors:** The synthesis of  $\text{Sb}^{3+}$ -doped  $(\text{C}_{12}\text{H}_{28}\text{N})_2\text{CdCl}_x\text{Br}_{4-x}$  phosphors is similar to that of  $\text{Sb}^{3+}$ -doped  $(\text{C}_{12}\text{H}_{28}\text{N})_2\text{CdCl}_4$  phosphors, but it is necessary to pay attention to the ratio of Cl to Br in the precursors.

**Preparation of  $(\text{C}_{12}\text{H}_{28}\text{N})_2\text{CdX}_4$  ( $X = \text{Cl}, \text{Br}$ ) crystals:** 1 mmol  $\text{CdX}_2$  and 2 mmol  $\text{C}_{12}\text{H}_{28}\text{NX}$  were dissolved in 2.5 mL DMF via ultrasound treatment. Subsequently,  $(\text{C}_{12}\text{H}_{28}\text{N})_2\text{CdX}_4$  bulk crystals were harvested by diffusing  $\text{Et}_2\text{O}$  into the above solution.

**Preparation of WLED:** The  $(\text{C}_{12}\text{H}_{28}\text{N})_2\text{CdCl}_4:\text{Sb}^{3+}$  powders are evenly mixed with commercial blue phosphors  $\text{BaMgAl}_{10}\text{O}_{17}:\text{Eu}^{2+}$ , green phosphors  $\text{Ba}_2\text{SiO}_4:\text{Eu}^{2+}$ , and AB glue, and then the above mixture is coated on the 365 nm LED chip. Before testing, the as-fabricated device should be treated in a vacuum environment at 60 °C for 30 minutes.

**Preparation of NIR LED:** First,  $(\text{C}_{12}\text{H}_{28}\text{N})_2\text{CdBr}_4:\text{Sb}^{3+}$  NIR phosphors were blend with AB glue uniformly. Then, the above mixture was coated on 450 blue LED chip. Before testing, the as-fabricated device should be treated in a vacuum environment at 60 °C for 30 minutes.

**Characterization:** The crystal structures of the as-synthesized compounds were measured by XtaLAB Synergy instrument. Powder X-ray diffraction (PXRD) patterns were collected using SmartLab SE instrument. The morphology and elemental mapping were performed using a new high-resolution field emission scanning electron microscope (SEM, Philips XL30). Energy-dispersive X-ray spectroscopy (EDS) was measured using Oxford Ultim Max65 instrument. The

Raman spectra were acquired on a confocal Raman imaging system (WITec alpha300 R) at an excitation wavelength of 532 nm laser. X-ray photoelectron spectroscopy (XPS) characterization was performed using an X-ray photoelectron spectrometer (ESCALAB 250XI+) manufactured by Thermo Fisher Scientific. The absorption spectra were carried out using Lambda 750 instrument. PL and PLE spectra were performed using HORIBA Fluorolog-QM spectrograph. PLQY and time-resolved PL spectra were evaluated by Edinburgh FLS 1000 instrument. Variable-temperature PL spectra were collected by HORIBA Fluorolog-QM spectrograph. Power-dependent emission spectra were carried out using Witec alpha300R under 405 nm laser excitation. Thermogravimetric analysis (TGA) was characterized by using a thermogravimetric analyzer DTG-60 manufactured in Shimadzu. Electroluminescence (EL) spectra were obtained using Hopoo HPCS6500 instrument.

**Calculation details:** All calculations were performed using the plane-wave pseudopotential method implemented in the CASTEP package. The exchange-correlation functional was chosen as the Perdew-Burke-Ernzerhof (PBE) functional within the generalized gradient approximation (GGA). The k-point separation was set as gamma point only in the Brillouin zone leading to corresponding Monkhorst-Pack k-point meshes of  $3\times3\times3$ .

**Table S1.** Crystal data and structure refinement of the title compounds.

| Empirical formula                                | (C <sub>12</sub> H <sub>28</sub> N) <sub>2</sub> CdCl <sub>4</sub> | (C <sub>12</sub> H <sub>28</sub> N) <sub>2</sub> CdBr <sub>4</sub> | (C <sub>12</sub> H <sub>28</sub> N) <sub>2</sub> SbBr <sub>5</sub> | (C <sub>12</sub> H <sub>28</sub> N) <sub>2</sub> SbCl <sub>5</sub> |
|--------------------------------------------------|--------------------------------------------------------------------|--------------------------------------------------------------------|--------------------------------------------------------------------|--------------------------------------------------------------------|
| Formula weight                                   | 626.92                                                             | 804.72                                                             | 893.97                                                             | 671.70                                                             |
| Crystal system                                   | monoclinic                                                         | monoclinic                                                         | monoclinic                                                         | triclinic                                                          |
| Space group                                      | C2/c                                                               | C2/c                                                               | P21/c                                                              | P-1                                                                |
| a/Å                                              | 32.768(2)                                                          | 33.373(7)                                                          | 18.565(5)                                                          | 10.6100(2)                                                         |
| b/Å                                              | 13.9364(9)                                                         | 14.437(3)                                                          | 11.840(3)                                                          | 10.7418(2)                                                         |
| c/Å                                              | 15.0048(9)                                                         | 14.999(3)                                                          | 16.708(4)                                                          | 16.2363(3)                                                         |
| α/°                                              | 90°                                                                | 90°                                                                | 90°                                                                | 76.000(2)                                                          |
| β/°                                              | 109.9740(2)°                                                       | 111.357(6)°                                                        | 103.640(5)°                                                        | 74.827(2)                                                          |
| γ/°                                              | 90°                                                                | 90°                                                                | 90°                                                                | 72.614(2)                                                          |
| Volume/Å <sup>3</sup>                            | 6464.2(7)                                                          | 2299.53(13)                                                        | 3569.0(16)                                                         | 1677.22(6)                                                         |
| Z                                                | 8                                                                  | 4                                                                  | 4                                                                  | 2                                                                  |
| Density (calculated)<br>(g·cm <sup>-3</sup> )    | 1.288                                                              | 1.588                                                              | 1.330                                                              | 1.664                                                              |
| Absorption<br>coefficient<br>(mm <sup>-1</sup> ) | 1.020                                                              | 5.412                                                              | 1.235                                                              | 6.385                                                              |
| Data/restraints/parameters                       | 7351/2/287                                                         | 6875/2/309                                                         | 8994/0/297                                                         | 6254/72/296                                                        |
| Goodness of fit on F <sup>2</sup>                | 0.950                                                              | 0.956                                                              | 1.026                                                              | 1.041                                                              |
| Final R indexes<br>[I ≥ 2σ(I)]                   | R <sub>1</sub> = 0.0340<br>wR <sub>2</sub> = 0.0699                | R <sub>1</sub> = 0.0541<br>wR <sub>2</sub> = 0.1050                | R <sub>1</sub> = 0.0230<br>wR <sub>2</sub> = 0.0530                | R <sub>1</sub> = 0.0799<br>wR <sub>2</sub> = 0.1592                |
| Final R indexes [all<br>data]                    | R <sub>1</sub> = 0.0633<br>wR <sub>2</sub> = 0.0820                | R <sub>1</sub> = 0.1422<br>wR <sub>2</sub> = 0.1343                | R <sub>1</sub> = 0.0255<br>wR <sub>2</sub> = 0.0543                | R <sub>1</sub> = 0.1700<br>wR <sub>2</sub> = 0.1968                |

**Table S2.** Comparison of element concentrations obtained from EDS analysis of  $x\%$ Sb<sup>3+</sup>-doped (C<sub>12</sub>H<sub>28</sub>N)<sub>2</sub>CdCl<sub>4</sub>.

| Element | 5%    | 10%   | 15%   | 20%   | 25%   |
|---------|-------|-------|-------|-------|-------|
| Cl (%)  | 80.44 | 79.3  | 79.54 | 78.92 | 79.2  |
| Cd (%)  | 19.07 | 20.07 | 19.45 | 19.5  | 18.72 |
| Sb (%)  | 0.49  | 0.63  | 1.01  | 1.58  | 2.08  |

**Table S3.** Comparison of element concentrations obtained from EDS analysis of  $x\%$ Sb<sup>3+</sup>-doped (C<sub>12</sub>H<sub>28</sub>N)<sub>2</sub>CdBr<sub>4</sub>

| Element | 10%   | 15%   | 20%  | 25%   | 30%  |
|---------|-------|-------|------|-------|------|
| Br (%)  | 79.75 | 80.09 | 79.1 | 79.74 | 78.5 |
| Cd (%)  | 19.85 | 18.97 | 19.6 | 18.43 | 18.9 |
| Sb (%)  | 0.41  | 0.93  | 1.3  | 1.83  | 2.6  |

**Table S4.** The optical properties of pure Sb(III)-based compounds and Sb<sup>3+</sup>-doped samples.

| Compounds                                                                            | PLE (nm) | PL (nm) | Stokes shift (nm) | PLQY (%) | Decay lifetime (LE) |
|--------------------------------------------------------------------------------------|----------|---------|-------------------|----------|---------------------|
| (C <sub>12</sub> H <sub>28</sub> N) <sub>2</sub> SbCl <sub>5</sub>                   | 380      | 610     | 230               | 95.52    | 5.31 μs             |
| (C <sub>12</sub> H <sub>28</sub> N) <sub>2</sub> SbBr <sub>5</sub>                   | 460      | 675     | 215               | 60.82    | 3.37 μs             |
| (C <sub>12</sub> H <sub>28</sub> N) <sub>2</sub> CdCl <sub>4</sub> :Sb <sup>3+</sup> | 350      | 660     | 310               | 85.52    | 1.70 μs             |
| (C <sub>12</sub> H <sub>28</sub> N) <sub>2</sub> CdBr <sub>4</sub> :Sb <sup>3+</sup> | 450      | 720     | 270               | 42.63    | 0.23 μs             |

**Table S5.** Photophysical properties of low-dimensional lead-free metal halides with broadband NIR emission.

| Compounds                                                                                            | PLE (nm) | PL (nm) | Stokes shift (nm) | PLQY (%) | Refs.     |
|------------------------------------------------------------------------------------------------------|----------|---------|-------------------|----------|-----------|
| Bmpip <sub>2</sub> SnI <sub>4</sub>                                                                  | 370      | 730     | 360               | 35       | 1         |
| Cs <sub>2</sub> ZnCl <sub>4</sub> :Sb <sup>3+</sup>                                                  | 316      | 745     | 429               | 69.9     | 2         |
| Rb <sub>2</sub> InBr <sub>5</sub> ·H <sub>2</sub> O:Sb <sup>3+</sup>                                 | 395      | 766     | 160               | 18.1     | 3         |
| (C <sub>8</sub> NH <sub>12</sub> ) <sub>6</sub> InBr <sub>9</sub> ·H <sub>2</sub> O:Sb <sup>3+</sup> | 355      | 720     | 365               | 35.5     | 4         |
| (PPZ) <sub>2</sub> SbCl <sub>7</sub> ·5H <sub>2</sub> O                                              | 350      | 720     | 370               | 24.7     | 5         |
| (MTP) <sub>2</sub> SbBr <sub>5</sub>                                                                 | 450      | 735     | 285               | 5.5      | 6         |
| Cs <sub>2</sub> ZnCl <sub>4</sub> :Sn <sup>2+</sup>                                                  | 377      | 700     | 323               | 41       | 7         |
| (C <sub>13</sub> H <sub>22</sub> N) <sub>2</sub> Sb <sub>2</sub> Cl <sub>8</sub>                     | 350      | 865     | 515               | 5        | 8         |
| (C <sub>10</sub> H <sub>16</sub> N) <sub>2</sub> Sb <sub>2</sub> Cl <sub>8</sub>                     | 345      | 990     | 645               | 3        | 8         |
| (C <sub>16</sub> H <sub>36</sub> P)SbCl <sub>4</sub>                                                 | 335      | 1070    | 735               | 1        | 8         |
| (C <sub>12</sub> H <sub>28</sub> N) <sub>2</sub> CdBr <sub>4</sub> :Sb <sup>3+</sup>                 | 450      | 720     | 270               | 42.6     | This work |

**Table S6.** Comparison of the bond lengths of (C<sub>12</sub>H<sub>28</sub>N)<sub>2</sub>SbX<sub>5</sub> and Sb<sup>3+</sup>-doped (C<sub>12</sub>H<sub>28</sub>N)<sub>2</sub>CdX<sub>4</sub> in the ground state and excited state.

| (C <sub>12</sub> H <sub>28</sub> N) <sub>2</sub> SbCl <sub>5</sub>                         |           |            |            |           |                        |                        |
|--------------------------------------------------------------------------------------------|-----------|------------|------------|-----------|------------------------|------------------------|
|                                                                                            | Sb-Cl1(Å) | Sb-Cl2(Å)  | Sb-Cl3(Å)  | Sb-Cl4(Å) | Sb-Cl5(Å)              | $\Delta d$             |
| Ground state                                                                               | 2.412     | 2.675      | 2.653      | 2.605     | 2.650                  | 1.364×10 <sup>-3</sup> |
| Excited state                                                                              | 2.412     | 2.673      | 2.651      | 2.606     | 2.651                  | 1.362×10 <sup>-3</sup> |
| (C <sub>12</sub> H <sub>28</sub> N) <sub>2</sub> SbBr <sub>5</sub>                         |           |            |            |           |                        |                        |
|                                                                                            | Sb-Br1(Å) | Sb- Br2(Å) | Sb- Br3(Å) | Sb-Br4(Å) | Sb-Br5(Å)              | $\Delta d$             |
| Ground state                                                                               | 2.562     | 2.851      | 2.855      | 2.768     | 2.806                  | 1.517×10 <sup>-3</sup> |
| Excited state                                                                              | 2.589     | 2.846      | 2.831      | 2.760     | 2.787                  | 1.105×10 <sup>-3</sup> |
| Sb <sup>3+</sup> -doped (C <sub>12</sub> H <sub>28</sub> N) <sub>2</sub> CdCl <sub>4</sub> |           |            |            |           |                        |                        |
|                                                                                            | Sb-Cl1(Å) | Sb-Cl2(Å)  | Sb-Cl3(Å)  | Sb-Cl4(Å) | $\Delta d$             |                        |
| Ground state                                                                               | 2.593     | 2.733      | 2.643      | 2.533     | 6.239×10 <sup>-4</sup> |                        |
| Excited state                                                                              | 3.108     | 2.504      | 2.596      | 2.697     | 5.735×10 <sup>-3</sup> |                        |
| Sb <sup>3+</sup> -doped (C <sub>12</sub> H <sub>28</sub> N) <sub>2</sub> CdBr <sub>4</sub> |           |            |            |           |                        |                        |
|                                                                                            | Sb-Br1(Å) | Sb-Br2(Å)  | Sb-Br3(Å)  | Sb-Br4(Å) | $\Delta d$             |                        |
| Ground state                                                                               | 2.869     | 2.757      | 2.849      | 2.683     | 5.717×10 <sup>-4</sup> |                        |
| Excited state                                                                              | 3.268     | 2.817      | 2.654      | 2.807     | 5.054×10 <sup>-3</sup> |                        |

**Table S7.** Comparison of bond angles of  $(C_{12}H_{28}N)_2SbX_5$  and  $Sb^{3+}$ -doped  $(C_{12}H_{28}N)_2CdX_4$  in the ground state and excited state.

| (C <sub>12</sub> H <sub>28</sub> N) <sub>2</sub> SbCl <sub>5</sub>                         |              |         |         |         |         |          |                |        |                |
|--------------------------------------------------------------------------------------------|--------------|---------|---------|---------|---------|----------|----------------|--------|----------------|
|                                                                                            | Cl1-         | Cl1-    | Cl1-    | Cl1-    | Cl2-    | Cl3-     | Cl5-           | Cl4-   | σ <sup>2</sup> |
|                                                                                            | Sb-          | Sb-     | Sb-     | Sb-     | Sb-     | Sb-      | Sb-            | Sb-    |                |
|                                                                                            | Cl2(°)       | Cl3(°)  | Cl4(°)  | Cl5(°)  | Cl4(°)  | Cl2(°)   | Cl3(°)         | Cl5(°) |                |
| Ground state                                                                               | 88.768       | 92.831  | 84.641  | 91.346  | 88.060  | 90.532   | 93.098         | 88.778 | 7.885          |
| Excited state                                                                              | 84.639       | 91.387  | 88.609  | 92.753  | 93.167  | 88.732   | 87.945         | 90.631 | 8.062          |
| (C <sub>12</sub> H <sub>28</sub> N) <sub>2</sub> SbBr <sub>5</sub>                         |              |         |         |         |         |          |                |        |                |
|                                                                                            | Br1-         | Br1-    | Br1-    | Br1-    | Br2-    | Br3-     | Br5-           | Br4-   | σ <sup>2</sup> |
|                                                                                            | Sb-          | Sb-     | Sb-     | Sb-     | Sb-     | Sb-      | Sb-            | Sb-    |                |
|                                                                                            | Br2(°)       | Br3(°)  | Br4(°)  | Br5(°)  | Br4(°)  | Br2(°)   | Br3(°)         | Br5(°) |                |
| Ground state                                                                               | 91.196       | 92.175  | 94.682  | 89.314  | 88.276  | 91.036   | 87.848         | 92.690 | 6.352          |
| Excited state                                                                              | 89.143       | 94.266  | 93.947  | 90.044  | 88.854  | 90.035   | 86.673         | 94.215 | 9.238          |
| Sb <sup>3+</sup> -doped (C <sub>12</sub> H <sub>28</sub> N) <sub>2</sub> CdCl <sub>4</sub> |              |         |         |         |         |          |                |        |                |
|                                                                                            | Cl1-Sb-      | Cl1-Sb- | Cl1-Sb- | Cl2-Sb- | Cl3-Sb- | Cl3-Sb-  | σ <sup>2</sup> |        |                |
|                                                                                            | Cl2(°)       | Cl3(°)  | Cl4(°)  | Cl4(°)  | Cl2(°)  | Cl4(°)   |                |        |                |
|                                                                                            | Ground state | 100.987 | 109.005 | 111.464 | 106.787 | 113.771  |                |        | 113.954        |
| Excited state                                                                              | 81.189       | 108.694 | 110.386 | 137.145 | 102.881 | 94.879   | 466.594        |        |                |
| Sb <sup>3+</sup> -doped (C <sub>12</sub> H <sub>28</sub> N) <sub>2</sub> CdBr <sub>4</sub> |              |         |         |         |         |          |                |        |                |
|                                                                                            | Br1-Sb-      | Br1-Sb- | Br1-Sb- | Br2-Sb- | Br3-Sb- | Br3-Sb-  | σ <sup>2</sup> |        |                |
|                                                                                            | Br2(°)       | Br3(°)  | Br4(°)  | Br4(°)  | Br2(°)  | Br4(°)   |                |        |                |
|                                                                                            | Ground state | 105.431 | 103.042 | 109.704 | 109.004 | 109.744  |                |        | 118.718        |
| Excited state                                                                              | 82.478       | 106.702 | 106.827 | 95.968  | 141.989 | 105.6692 | 398.229        |        |                |

### Evaluation of metal halide configuration distortion:

The deformation parameters ( $\Delta d$ ) and the magnitude of polyhedron angle variance ( $\sigma^2$ ) of  $[\text{SbCl}_5]^{2-}$  units are used to evaluate the degree of metal halide configuration distortions, and their values can be calculated by the following equations:

**(C<sub>25</sub>H<sub>22</sub>P)<sub>2</sub>SbX<sub>5</sub> single crystals:**

$$\Delta d = \frac{1}{6} \sum_{n=1}^6 \left( \frac{d_n - d_{ave}}{d_{ave}} \right)^2 \quad (1)$$

$$\sigma^2 = \frac{1}{11} \sum_{i=1}^{12} (\alpha_i - 90^\circ)^2 \quad (2)$$

**Sb<sup>3+</sup>-doped (C<sub>25</sub>H<sub>22</sub>P)SbX<sub>4</sub> single crystals:**

$$\Delta d = \frac{1}{4} \sum_{n=1}^4 \left( \frac{d_n - d_{ave}}{d_{ave}} \right)^2 \quad (3)$$

$$\sigma^2 = \frac{1}{4} \sum_{i=1}^5 (\alpha_i - 90^\circ)^2 \quad (4)$$

where  $d_{ave}$  is the average Sb-Cl bond length,  $d_n$  denotes the distances of Sb-Cl bonds, and  $\alpha_i$  represents the angle of Cl-Sb-Cl.

Note: Tables S6 and S7 exhibit the Sb-X bond lengths and X-Sb-X bond angles of (C<sub>12</sub>H<sub>28</sub>N)<sub>2</sub>SbX<sub>5</sub> and Sb<sup>3+</sup>-doped (C<sub>12</sub>H<sub>28</sub>N)<sub>2</sub>CdX<sub>4</sub> (X = Cl, Br) in the ground state and excited state, respectively. The bond length deformation ( $\Delta d$ ) and the bond angle variance ( $\sigma^2$ ) in the ground state and excited state of (C<sub>12</sub>H<sub>28</sub>N)<sub>2</sub>SbX<sub>5</sub> and Sb<sup>3+</sup>-doped (C<sub>12</sub>H<sub>28</sub>N)<sub>2</sub>CdX<sub>4</sub> were calculated in Tables S6 and S7. Moreover, the excited state lattice distortion degree ( $\eta$  and  $w$ ) was calculated via the following equation:

$$\eta = \left| \frac{\Delta d_{ES} - \Delta d_{GS}}{\Delta d_{GS}} \right| \times 100\% \quad (5)$$

$$w = \left| \frac{\sigma_{ES}^2 - \sigma_{GS}^2}{\sigma_{GS}^2} \right| \times 100\% \quad (6)$$

where  $\Delta d_{ES}$  and  $\Delta d_{GS}$  are the bond length deformation ( $\Delta d$ ) in the ground state and excited state, respectively.  $\Delta \sigma_{ES}^2$  and  $\Delta \sigma_{GS}^2$  are the bond angle variance in the ground state and excited state, respectively. Here, the calculated  $\eta$  of (C<sub>12</sub>H<sub>28</sub>N)<sub>2</sub>SbCl<sub>5</sub>, (C<sub>12</sub>H<sub>28</sub>N)<sub>2</sub>SbBr<sub>5</sub>, Sb<sup>3+</sup>-doped (C<sub>12</sub>H<sub>28</sub>N)<sub>2</sub>CdCl<sub>4</sub>, and Sb<sup>3+</sup>-doped (C<sub>12</sub>H<sub>28</sub>N)<sub>2</sub>CdBr<sub>4</sub> are 0.15%, 27.16%, 819.22%, and 784.03%, respectively, and the calculated  $w$  of (C<sub>12</sub>H<sub>28</sub>N)<sub>2</sub>SbCl<sub>5</sub>, (C<sub>12</sub>H<sub>28</sub>N)<sub>2</sub>SbBr<sub>5</sub>, Sb<sup>3+</sup>-doped (C<sub>12</sub>H<sub>28</sub>N)<sub>2</sub>CdCl<sub>4</sub>, and Sb<sup>3+</sup>-doped (C<sub>12</sub>H<sub>28</sub>N)<sub>2</sub>CdBr<sub>4</sub> are 2.24%, 45.43%, 1814.55%, and 1289.83%, respectively. Clearly, the values of  $\eta$  and  $w$  for the Sb<sup>3+</sup>-doped Cd(II)-based compounds are much larger than pure Sb(III)-based metal halides, which leads to a larger Stokes shift of Sb<sup>3+</sup>-doped Cd(II)-based compounds, and further enables us to obtain NIR emission.

**Table S8.** PLE band, PL band, output power, and photoelectric conversion efficiency of recently reported low-dimensional metal halides and oxide phosphors with NIR emission.

| Compounds                                                                                             | PLE band (nm) | PL band (nm) | Output power (mW) | Photoelectric conversion efficiency (%) | Ref       |
|-------------------------------------------------------------------------------------------------------|---------------|--------------|-------------------|-----------------------------------------|-----------|
| (C <sub>20</sub> H <sub>20</sub> P) <sub>2</sub> MnCl <sub>4</sub> :Sb <sup>3+</sup>                  | 400           | 718          | 13.35             | 2.6                                     | 9         |
| (C <sub>20</sub> H <sub>20</sub> P) <sub>2</sub> ZnCl <sub>4</sub> :Sb <sup>3+</sup>                  | 400           | 702          | 15.9              | 2.7                                     | 9         |
| (C <sub>20</sub> H <sub>20</sub> P) <sub>2</sub> CdCl <sub>4</sub> :Sb <sup>3+</sup>                  | 400           | 705          | 12.3              | 2.4                                     | 9         |
| Cs <sub>2</sub> ZnCl <sub>4</sub> :Sb <sup>3+</sup>                                                   | 316           | 745          | 27.2              | 2.9                                     | 2         |
| BaAl <sub>4</sub> Sb <sub>2</sub> O <sub>12</sub> :Cr <sup>3+</sup>                                   | 425           | 750          | 27.15             | 13.39                                   | 10        |
| LiInSi <sub>2</sub> O <sub>6</sub> :Cr <sup>3+</sup>                                                  | 460           | 840          | 51.6              | 17.2                                    | 11        |
| Ga <sub>3</sub> Al <sub>3</sub> Ge <sub>2</sub> O <sub>13</sub> :Cr <sup>3+</sup>                     | 430           | 816          | 34.95             | 12.8                                    | 12        |
| Ca <sub>4</sub> HfGe <sub>3</sub> O <sub>12</sub> :Cr <sup>3+</sup>                                   | 460           | 840          | 40                | 7                                       | 13        |
| Ca <sub>3.2</sub> Zn <sub>0.8</sub> HfGe <sub>3</sub> O <sub>12</sub> :Cr <sup>3+</sup>               | 450           | 890/1220     | 55                | 5.56                                    | 14        |
| Ca <sub>1.8</sub> Mg <sub>1.2</sub> Al <sub>2</sub> Ge <sub>3</sub> O <sub>12</sub> :Cr <sup>3+</sup> | 449           | 806          | 12.19             | 1.9                                     | 15        |
| Ba <sub>3</sub> GeO <sub>4</sub> Br <sub>2</sub> :Eu <sup>2+</sup>                                    | 450           | 685          | 30.1              | 22                                      | 16        |
| Ba <sub>3</sub> Lu(BO <sub>3</sub> ) <sub>3</sub> :Eu <sup>2+</sup>                                   | 450           | 720          | 4.7               | 11.6                                    | 17        |
| SrY <sub>2</sub> O <sub>4</sub> :Eu <sup>2+</sup>                                                     | 450           | 773          | 38.53             | -                                       | 18        |
| K <sub>3</sub> LuSi <sub>2</sub> O <sub>7</sub> :Eu <sup>2+</sup>                                     | 460           | 740          | 25.12             | -                                       | 19        |
| (C <sub>12</sub> H <sub>28</sub> N) <sub>2</sub> CdBr <sub>4</sub> :Sb <sup>3+</sup>                  | 450           | 720          | 52.92             | 17.76                                   | This work |

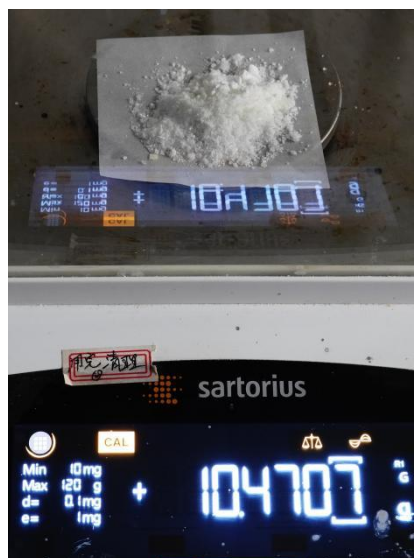

**Figure S1.** Physical image of the as-synthesized  $(C_{12}H_{28}N)_2CdCl_4:15\%Sb^{3+}$  phosphors.

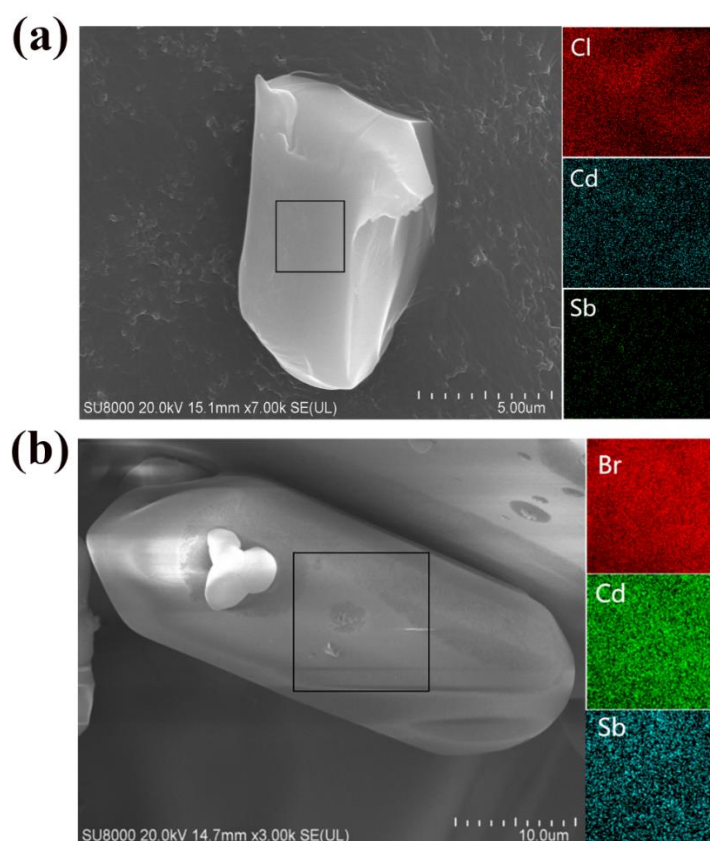

**Figure S2.** (a) SEM image of  $(C_{12}H_{28}N)_2CdCl_4:25\%Sb^{3+}$  and the element mapping images of Cl, Cd, and Sb, respectively. (b) SEM image of  $(C_{12}H_{28}N)_2CdBr_4:15\%Sb^{3+}$  and the element mapping images of Br, Cd, and Sb, respectively.

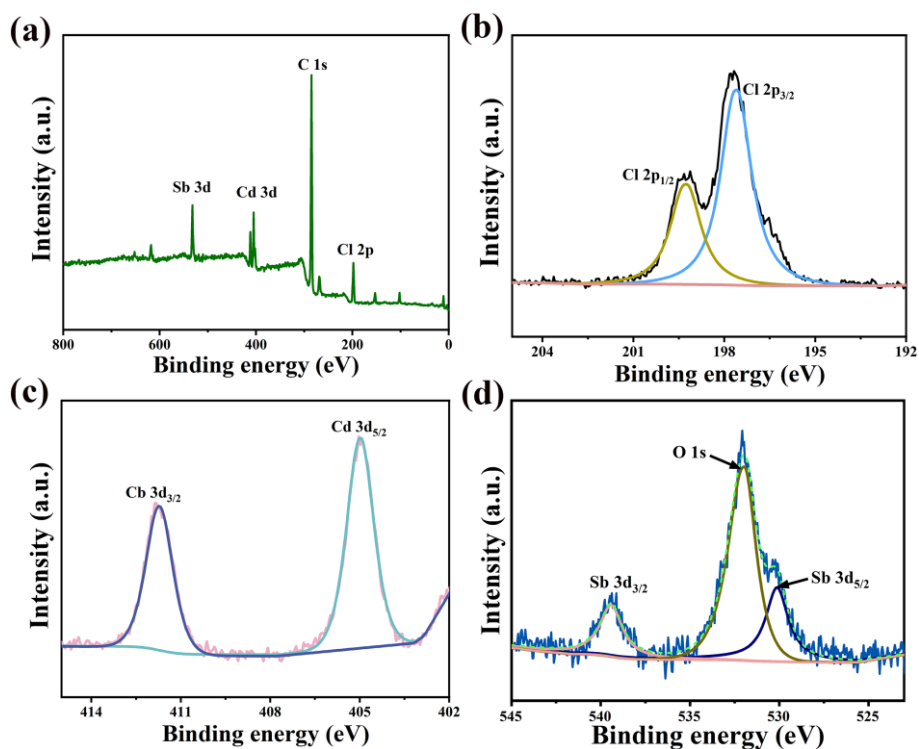

**Figure S3.** (a) X-ray photoelectron spectroscopic (XPS) analysis of  $(\text{C}_{12}\text{H}_{28}\text{N})_2\text{CdCl}_4:15\%\text{Sb}^{3+}$  and the corresponding high-resolution XPS spectra of (b) Cl 3d, (c) Cd 3d, and (d) Sb 3d, respectively.

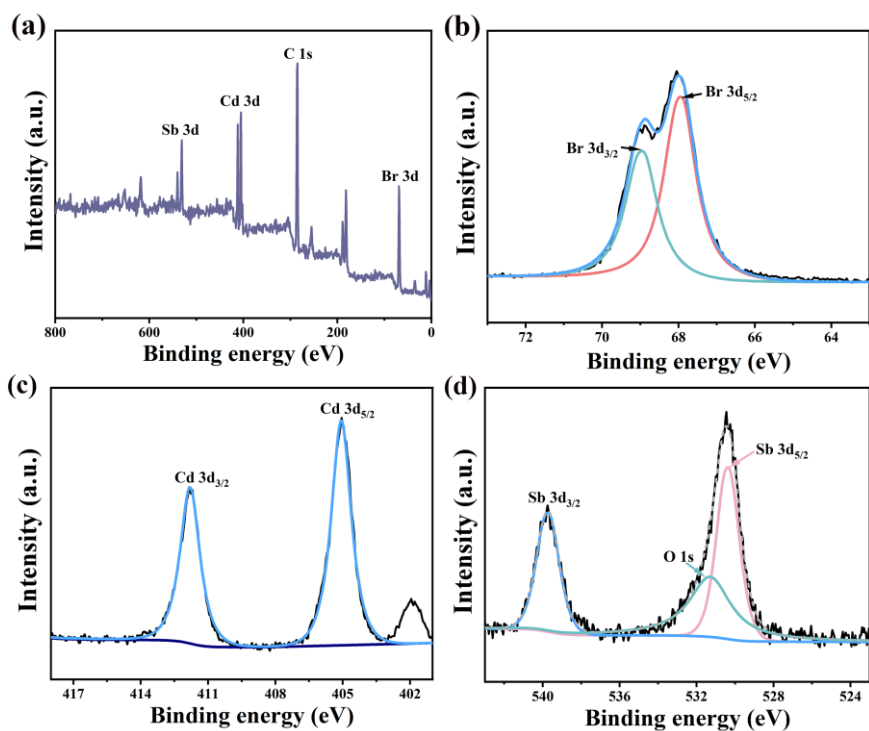

**Figure S4.** (a) X-ray photoelectron spectroscopic (XPS) analysis of  $(\text{C}_{12}\text{H}_{28}\text{N})_2\text{CdBr}_4:25\%\text{Sb}^{3+}$  and the corresponding high-resolution XPS spectra of (b) Br 3d, (c) Cd 3d, and (d) Sb 3d, respectively.

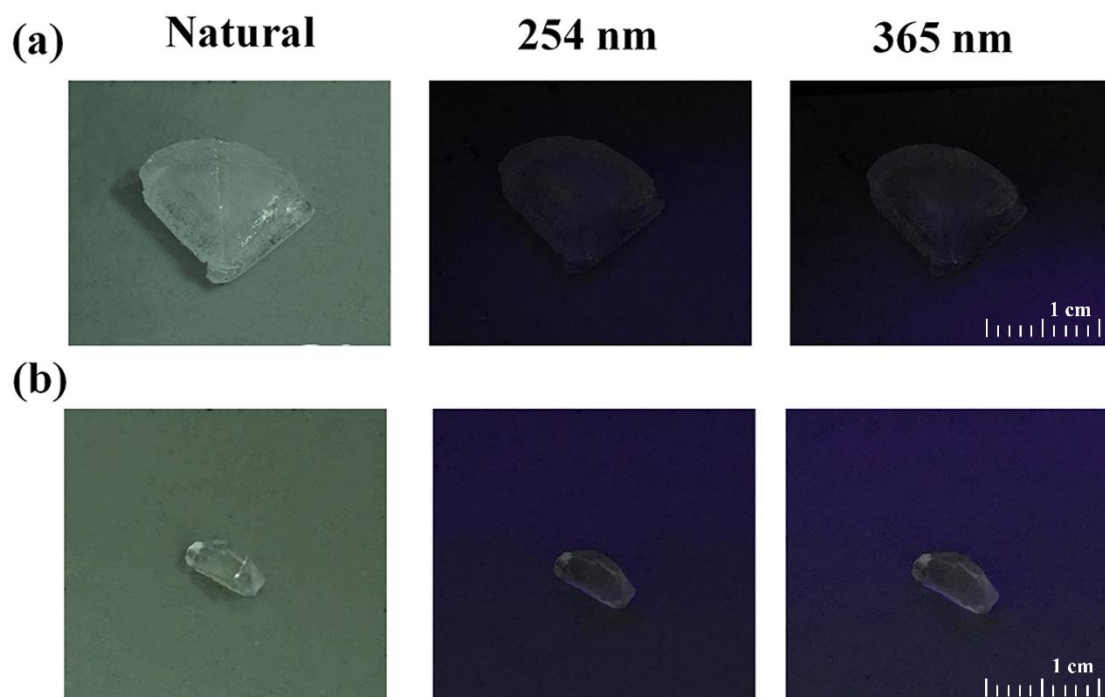

**Figure S5.** The optical photographs of (a)  $(C_{12}H_{28}N)_2CdCl_4$  and (b)  $(C_{12}H_{28}N)_2CdBr_4$  under 254 and 365 nm excitation, respectively.

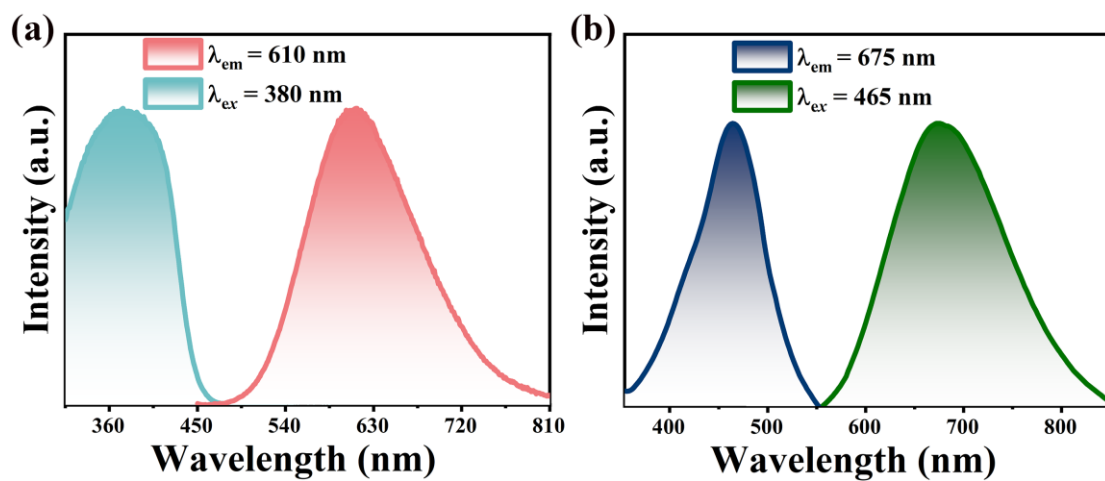

**Figure S6.** PLE and PL spectra of (a)  $(C_{12}H_{28}N)_2SbCl_5$  and (b)  $(C_{12}H_{28}N)_2SbBr_5$ .

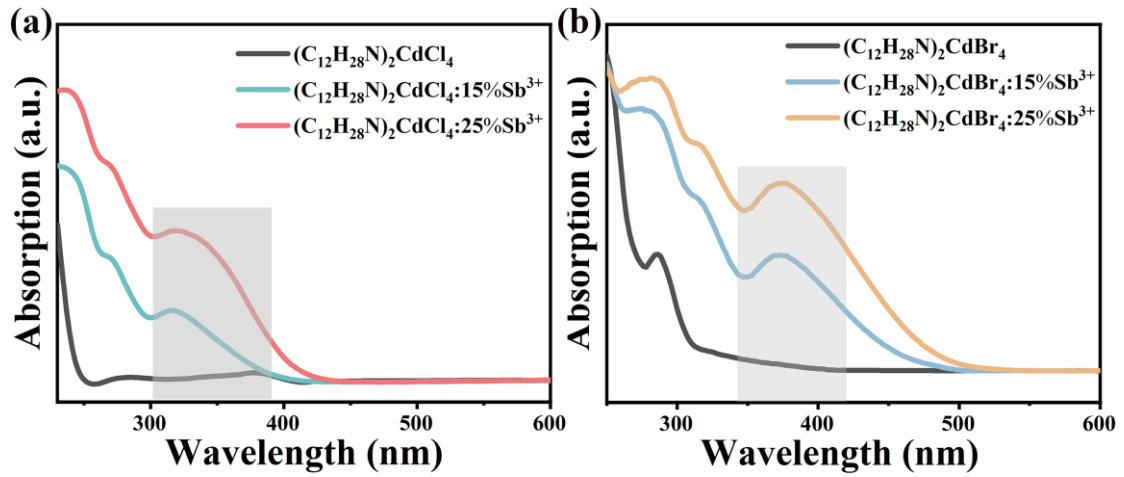

**Figure S7.** (a) The absorption spectra pristine and  $\text{Sb}^{3+}$ -doped  $(\text{C}_{12}\text{H}_{28}\text{N})_2\text{CdCl}_4$ . (b) The absorption spectra pristine and  $\text{Sb}^{3+}$ -doped  $(\text{C}_{12}\text{H}_{28}\text{N})_2\text{CdBr}_4$ .

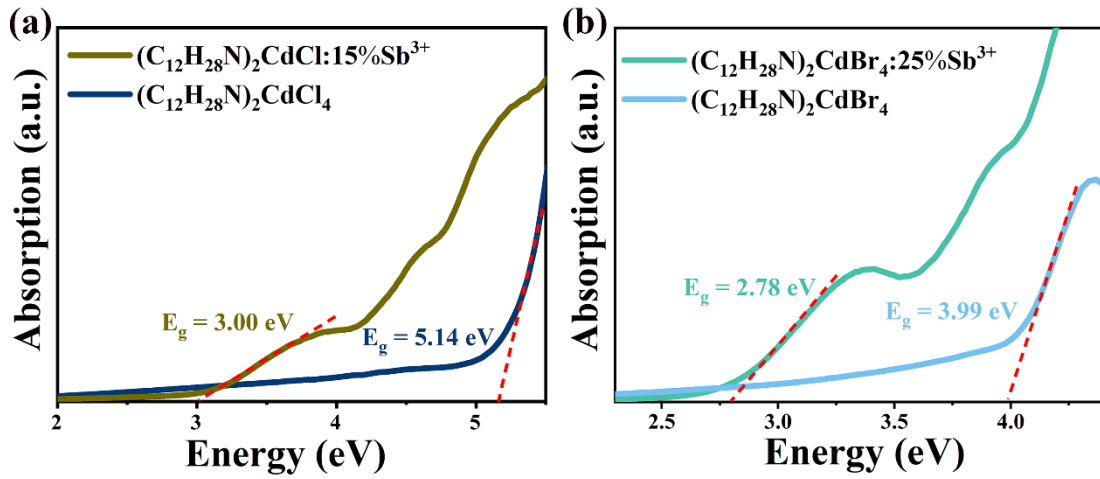

**Figure S8.** (a) The bandgap of pristine and  $\text{Sb}^{3+}$ -doped  $(\text{C}_{12}\text{H}_{28}\text{N})_2\text{CdCl}_4$ . (b) The bandgap of pristine and  $\text{Sb}^{3+}$ -doped  $(\text{C}_{12}\text{H}_{28}\text{N})_2\text{CdBr}_4$ .

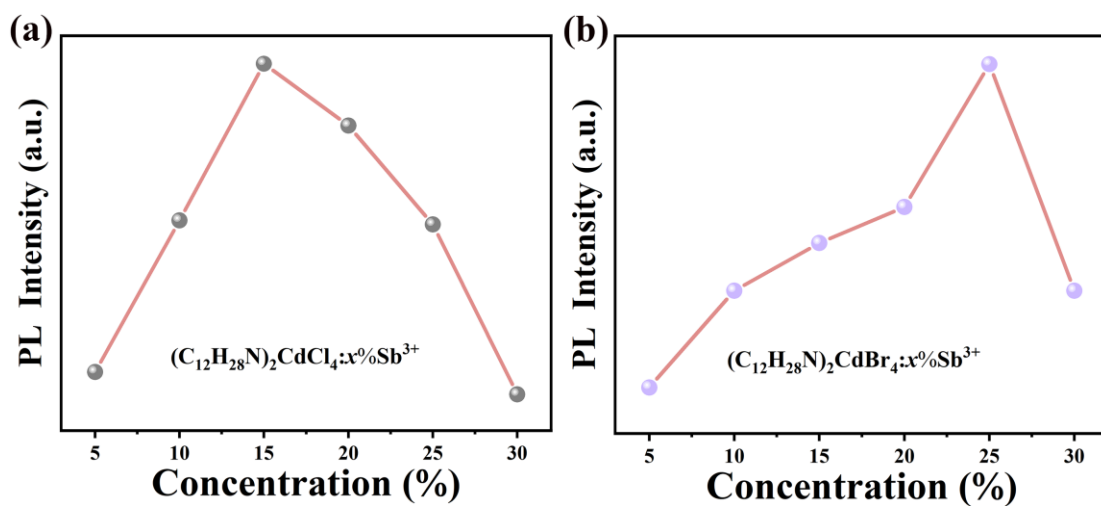

**Figure S9.** PL intensity (a)  $(\text{C}_{12}\text{H}_{28}\text{N})_2\text{CdCl}_4$  and (b)  $(\text{C}_{12}\text{H}_{28}\text{N})_2\text{CdBr}_4$  under various  $\text{Sb}^{3+}$  doping contents.

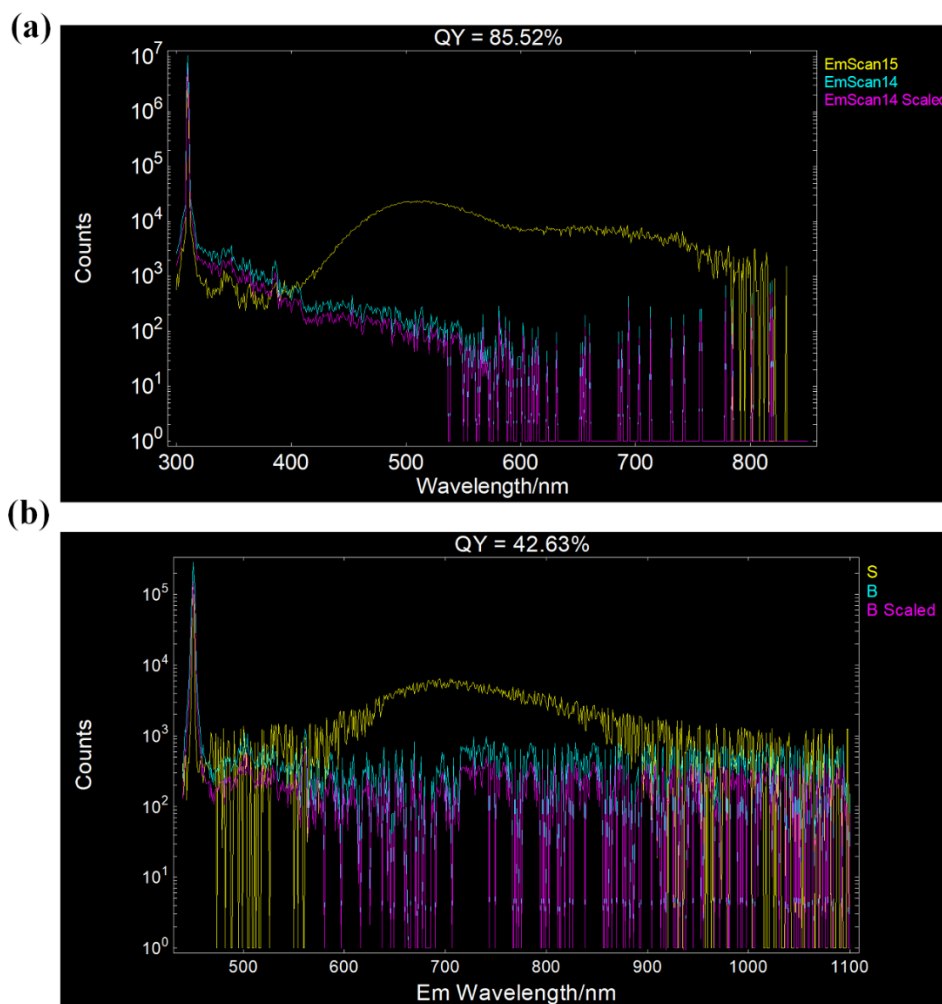

**Figure S10.** PLQY of (a) 15%  $\text{Sb}^{3+}$ -doped  $(\text{C}_{12}\text{H}_{28}\text{N})_2\text{CdCl}_4$  and (b) 25%  $\text{Sb}^{3+}$ -doped  $(\text{C}_{12}\text{H}_{28}\text{N})_2\text{CdBr}_4$ .

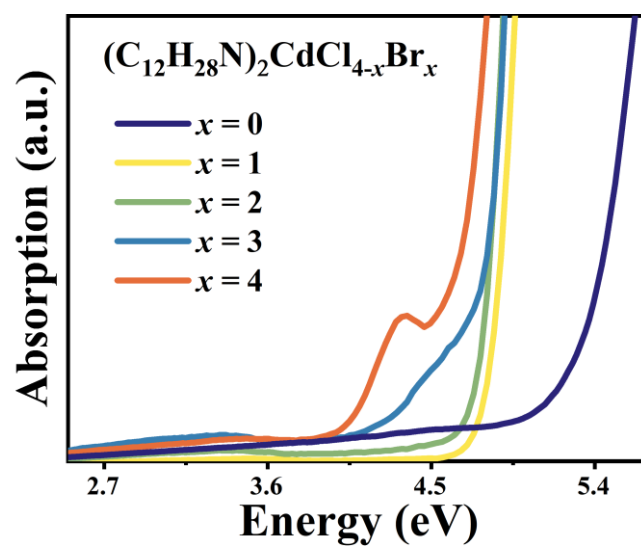

**Figure S11.** The bandgap of  $\text{Sb}^{3+}$ -doped  $(\text{C}_{12}\text{H}_{28}\text{N})_2\text{CdCl}_{4-x}\text{Br}_x$  phosphors with different Cl/Br ratios.

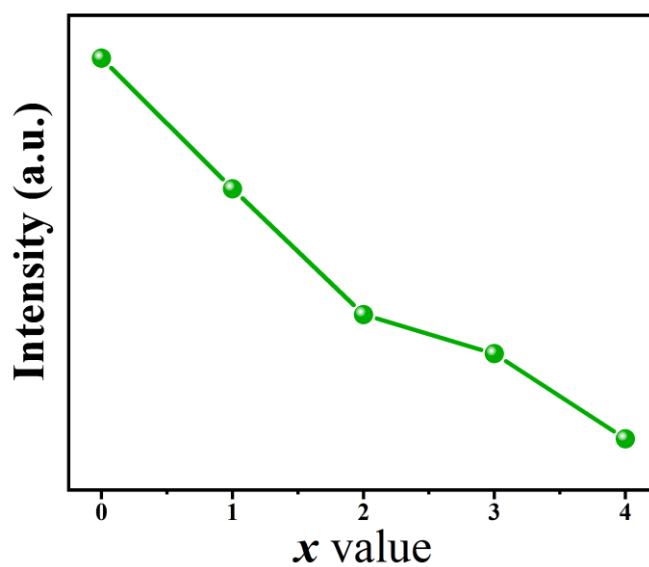

**Figure S12.** The emission intensity of  $(\text{C}_{12}\text{H}_{28}\text{N})_2\text{CdCl}_{4-x}\text{Br}_x$  with different Cl/Br ratios.

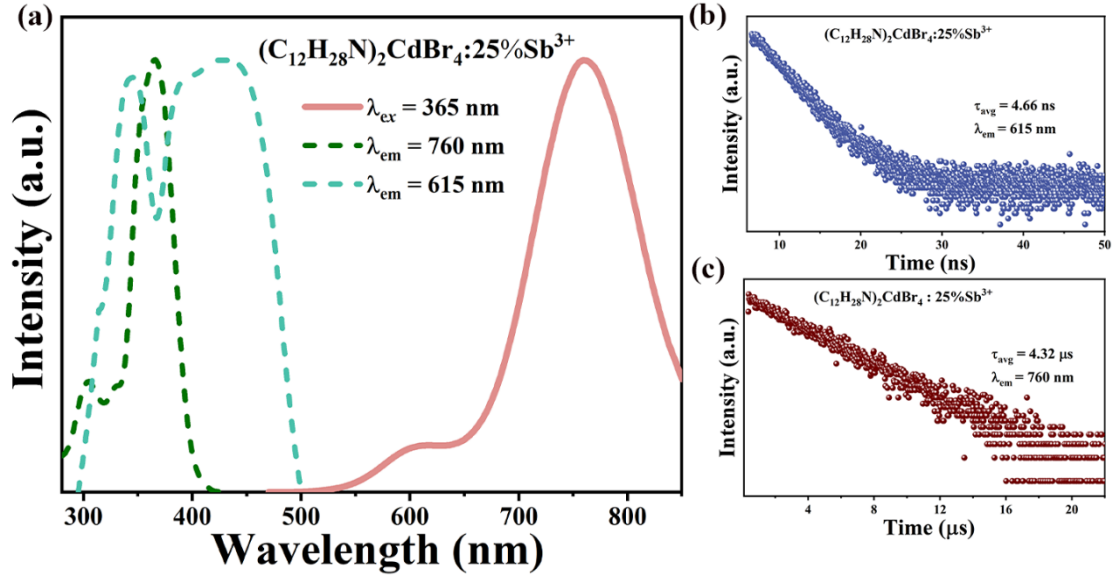

**Figure S13.** (a) PLE and PL spectra of  $(C_{12}H_{28}N)_2CdBr_4:25\%Sb^{3+}$  at 80 K. PL decay lifetimes of  $(C_{12}H_{28}N)_2CdBr_4:25\%Sb^{3+}$  monitored at (b) 615 nm emission and (c) 760 nm emission at 80 K.

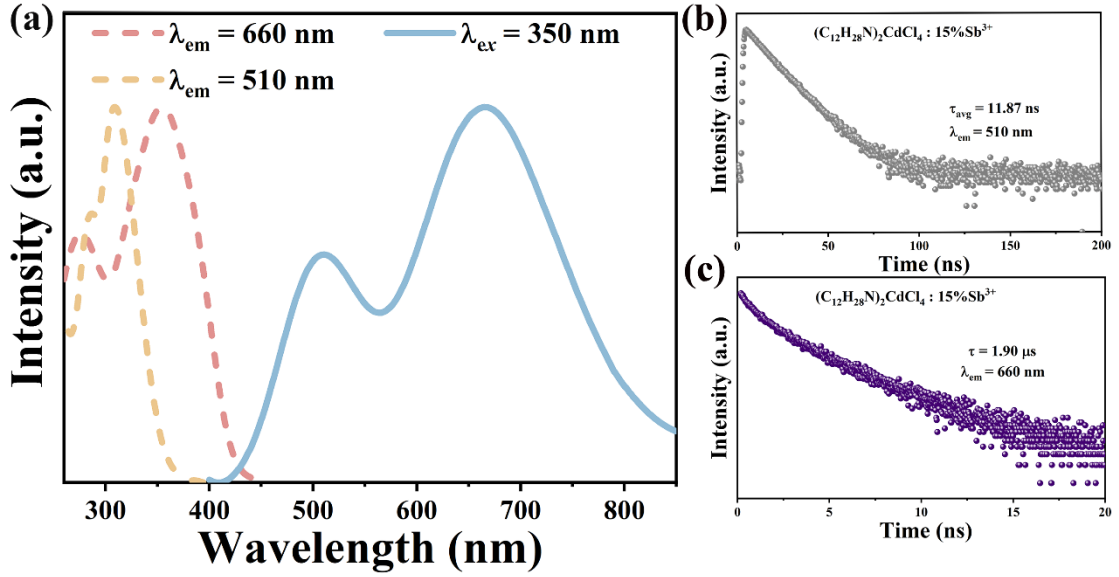

**Figure S14.** (a) RT PLE and PL spectra of  $(C_{12}H_{28}N)_2CdCl_4:15\%Sb^{3+}$ . RT PL decay lifetimes of  $(C_{12}H_{28}N)_2CdCl_4:15\%Sb^{3+}$  monitored at (b) 510 nm and (c) 660 nm.

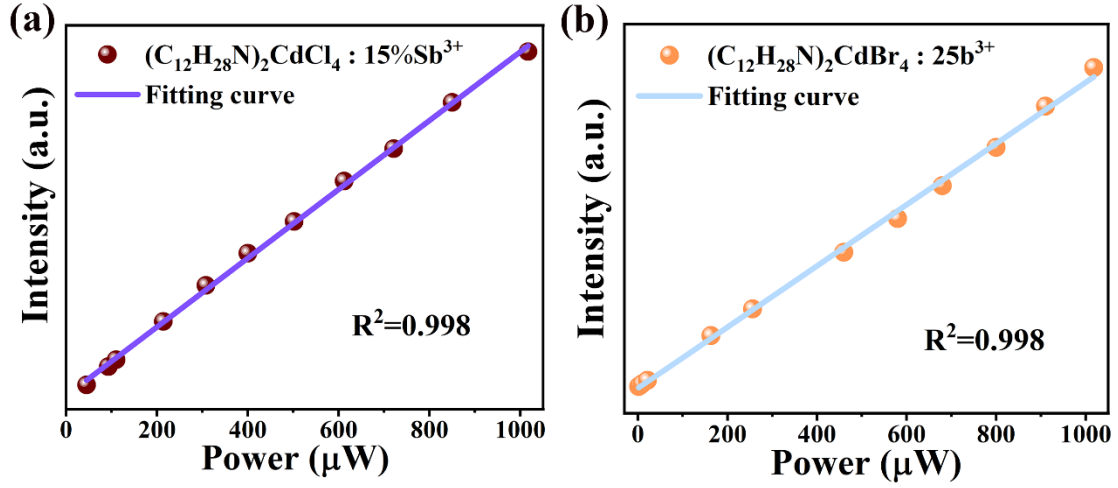

**Figure S15.** The PL intensity of (a)  $(\text{C}_{12}\text{H}_{28}\text{N})_2\text{CdCl}_4:15\%\text{Sb}^{3+}$  and  $(\text{C}_{12}\text{H}_{28}\text{N})_2\text{CdBr}_4:25\%\text{Sb}^{3+}$  under various excitation powers (405 nm laser excitation).

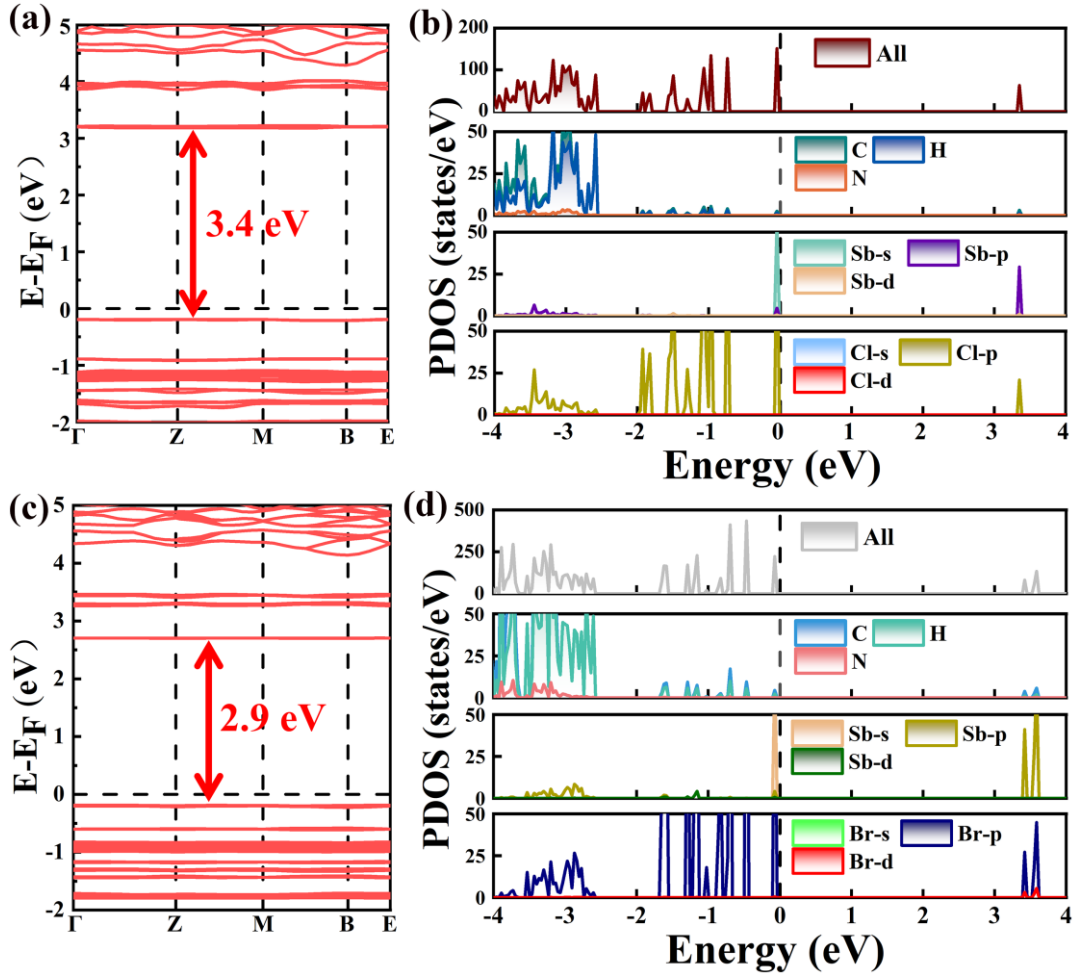

**Figure S16.** Band structure and partial DOS of (a, b)  $(\text{C}_{12}\text{H}_{28}\text{N})_2\text{SbCl}_5$  and (c, d)  $(\text{C}_{12}\text{H}_{28}\text{N})_2\text{SbBr}_5$ .

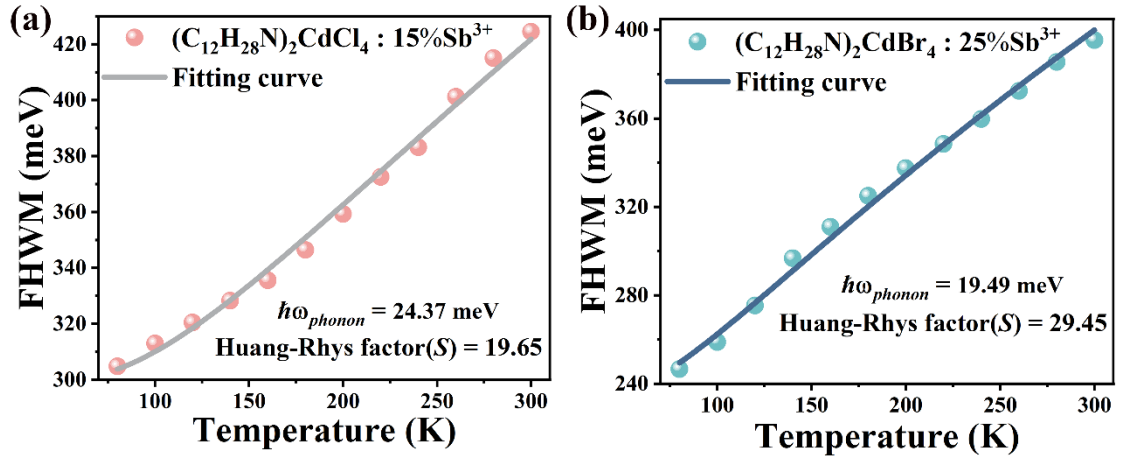

**Figure S17.** The fitted Huang-Rhys factor ( $S$ ) of (a)  $(\text{C}_{12}\text{H}_{28}\text{N})_2\text{CdCl}_4:15\%\text{Sb}^{3+}$  and (b)  $(\text{C}_{12}\text{H}_{28}\text{N})_2\text{CdBr}_4:25\%\text{Sb}^{3+}$ .

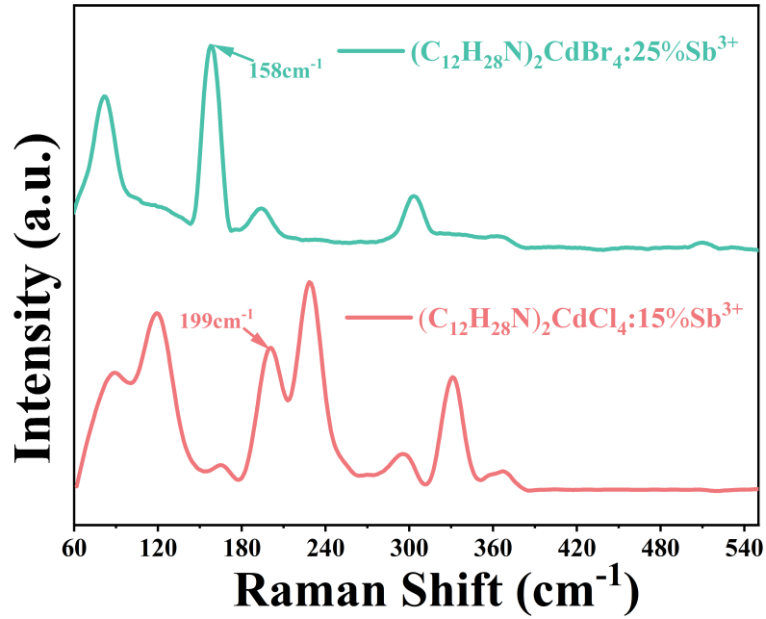

**Figure S18.** The Raman spectra of  $(\text{C}_{12}\text{H}_{28}\text{N})_2\text{CdCl}_4:15\%\text{Sb}^{3+}$  and  $(\text{C}_{12}\text{H}_{28}\text{N})_2\text{CdBr}_4:25\%\text{Sb}^{3+}$ .

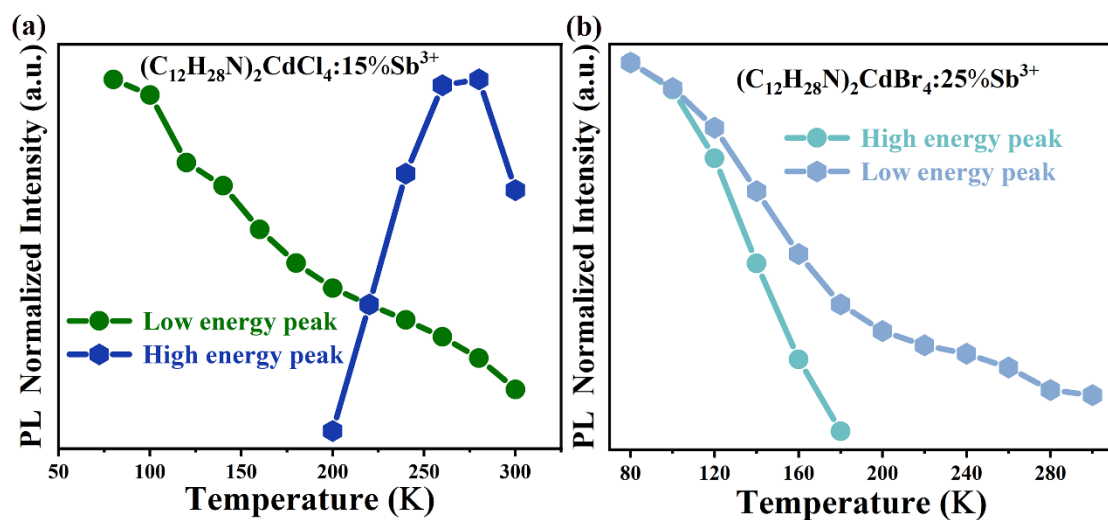

**Figure S19.** The emission intensity of (a)  $(C_{12}H_{28}N)_2CdCl_4:15\%Sb^{3+}$  and (b)  $(C_{12}H_{28}N)_2CdBr_4:25\%Sb^{3+}$  versus temperatures.

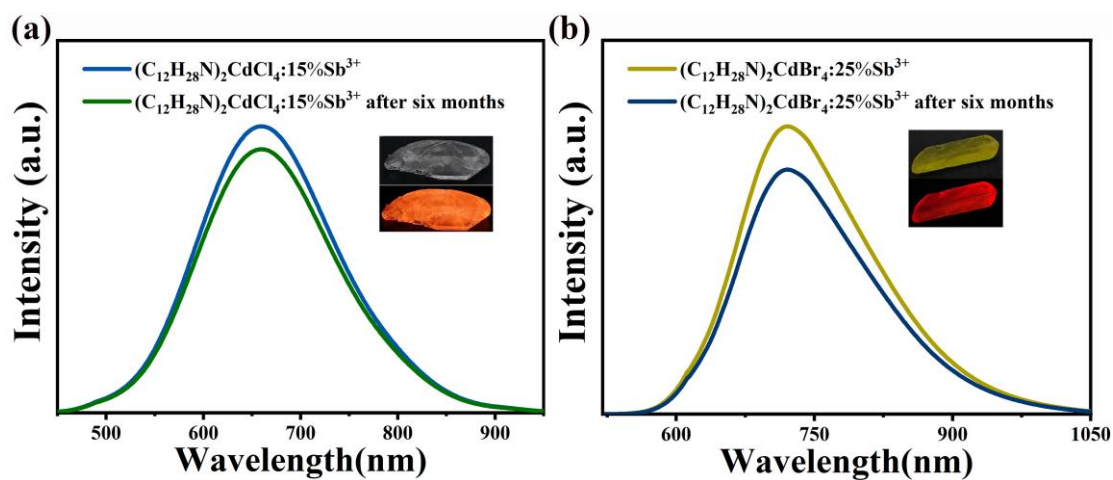

**Figure S20.** (a) PL spectra of  $(C_{12}H_{28}N)_2CdCl_4:15\%Sb^{3+}$  and (b)  $(C_{12}H_{28}N)_2CdBr_4:25\%Sb^{3+}$  before and after exposure to air for 6 months.

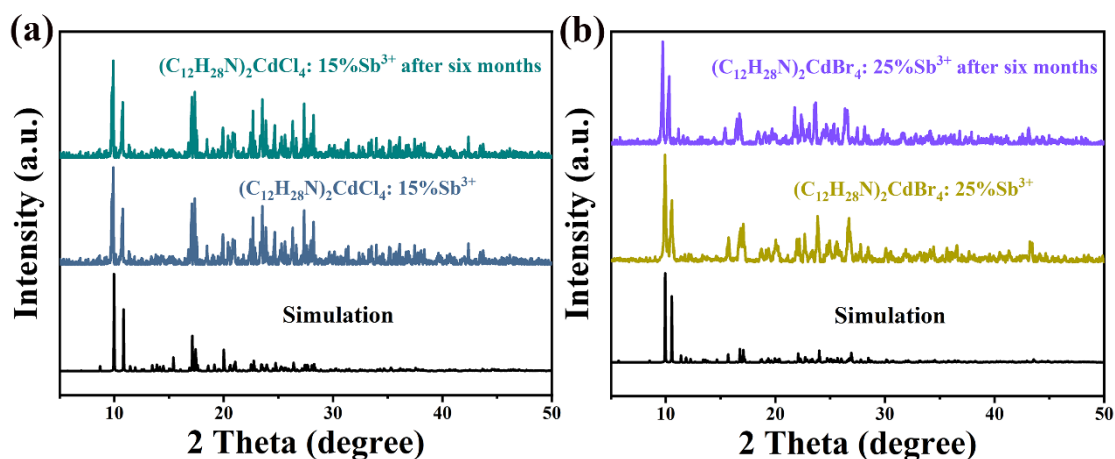

**Figure S21.** PXRD patterns of (a)  $(\text{C}_{12}\text{H}_{28}\text{N})_2\text{CdCl}_4:15\%\text{Sb}^{3+}$  and (b)  $(\text{C}_{12}\text{H}_{28}\text{N})_2\text{CdBr}_4:25\%\text{Sb}^{3+}$  before and after exposure to air for 6 months.

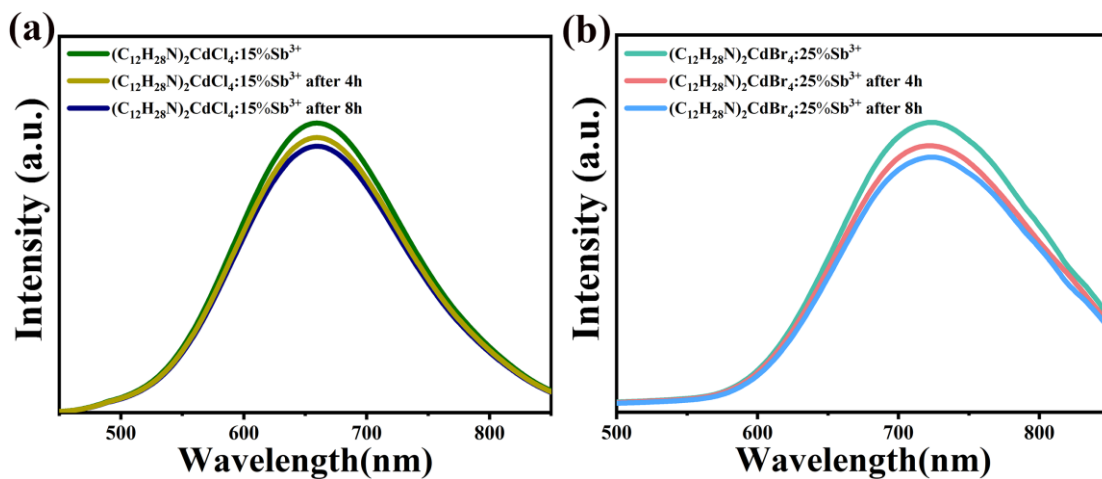

**Figure S22.** PL spectra of (a)  $(\text{C}_{12}\text{H}_{28}\text{N})_2\text{CdCl}_4:15\%\text{Sb}^{3+}$  and (b)  $(\text{C}_{12}\text{H}_{28}\text{N})_2\text{CdBr}_4:25\%\text{Sb}^{3+}$  before and after irradiation by 365 nm UV lamp for 4 h and 8 h.

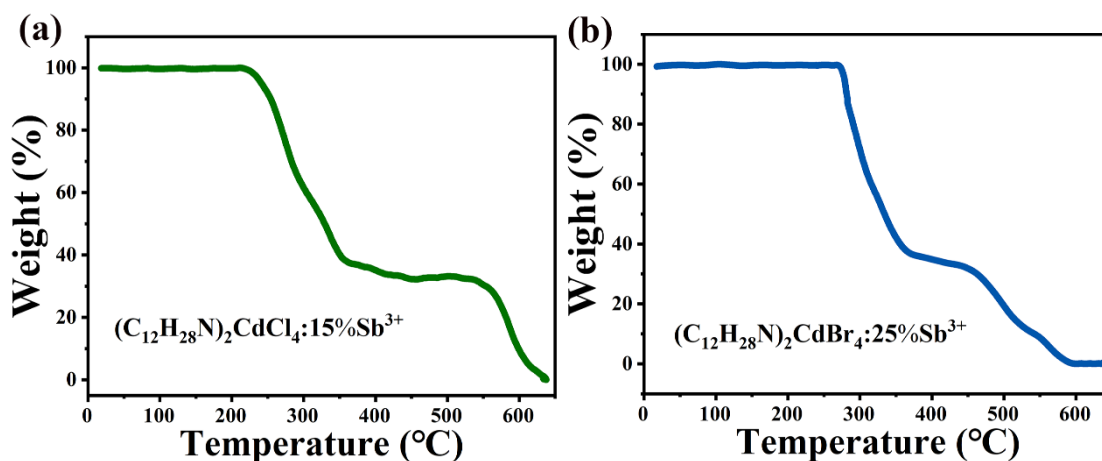

**Figure S23.** TGA curves of (a)  $15\%\text{Sb}^{3+}$ -doped  $(\text{C}_{12}\text{H}_{28}\text{N})_2\text{CdCl}_4$  and (b)  $15\%\text{Sb}^{3+}$ -doped  $(\text{C}_{12}\text{H}_{28}\text{N})_2\text{CdBr}_4$ .

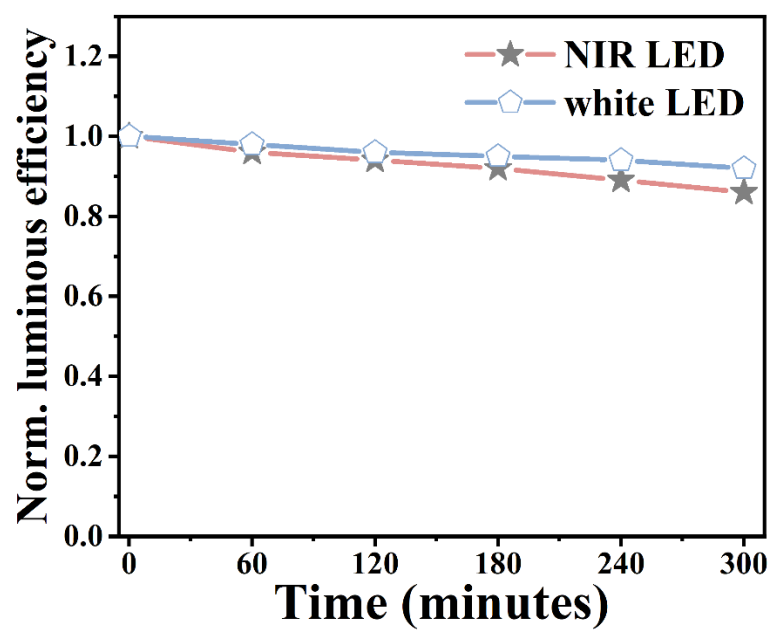

**Figure S24.** Long-time operational stability of NIR LED and white LED within 5h.

## References

- [1] V. Morad, Y. Shynkarenko, S. Yakunin, A. Brumberg, R. D. Schaller, M. V. Kovalenko, *J. Am. Chem. Soc.* **2019**, 141, 9764.
- [2] B. Su, M. Li, E. Song, Z. Xia, *Adv. Funct. Mater.* **2021**, 31, 2105316.
- [3] X. Liu, X. Xu, B. Li, Y. Liang, Q. Li, H. Jiang, D. Xu, *CCS Chem.* **2020**, 2, 216.
- [4] Z. Li, G. Song, Y. Li, L. Wang, T. Zhou, Z. Lin, R.-J. Xie, *J. Phys. Chem. Lett.* **2020**, 11, 10164.
- [5] J. B. Luo, J. H. Wei, Z. Z. Zhang, Z. L. He, D. B. Kuang, *Angew. Chem., Int. Ed.* **2023**, 62, e202216504.
- [6] B. Li, J. Jin, M. Yin, X. Zhang, M. S. Molokeev, Z. Xia, Y. Xu, *Angew. Chem., Int. Ed.* **2022**, 61, e202212741.
- [7] G. Zhang, D. Wang, J. Ren, X. Zhou, Y. Wang, *Laser Photon. Rev.* **2023**, 17, 2300158.
- [8] B. Su, S. Geng, Z. Xiao, Z. Xia, *Angew. Chem., Int. Ed.* **2022**, 61, e202208881.
- [9] S. Yu, H. Peng, Q. Wei, T. Li, W. Huang, X. He, Z. Du, J. Zhao, B. Zou, *Mater. Horizons* **2024**, 11, 2230.
- [10] J. Wang, Z. Lyu, G. Peng, D. Sun, S. Shen, Z. Lu, L. Wang, H. Zhao, S. Wei, H. You, *Chem. Mat.* **2023**, 35, 3968.
- [11] X. Xu, Q. Shao, L. Yao, Y. Dong, J. Jiang, *Chem. Eng. J.* **2020**, 383.
- [12] Q. Zhang, X. Ding, X. Ma, Z. Su, B. Liu, Y. Wang, *Laser Photon. Rev.* **2024**, DOI: 10.1002/lpor.202400541.
- [13] H. Zhang, J. Zhong, C. Li, L. Wang, W. Zhao, *J. Lumines.* **2022**, 251.
- [14] Y. Wang, Z. Xu, M. Shang, Y. Sun, X. Xing, P. Dang, J. Lin, *Laser Photon. Rev.* **2024**, DOI: 10.1002/lpor.202400295.
- [15] C. Yang, D. Zheng, X. Zou, X. Dai, B. Tang, M. S. Molokeev, X. Zhang, H. Zhang, Y. Liu, B. Lei, *Adv. Opt. Mater.* **2024**, DOI: 10.1002/adom.202303235.
- [16] Z. Tang, F. Du, L. Zhao, H. Liu, Z. Leng, H. Xie, G. Zhang, Y. Wang, *Laser Photon. Rev.* **2023**, 17, 2200911.
- [17] Z. Tang, F. Du, H. Liu, Z. Leng, X. Sun, H. Xie, M. Que, Y. Wang, *Adv. Opt. Mater.* **2022**, 10, 2102204.
- [18] Z. Yang, Y. Zhao, Y. Zhou, J. Qiao, Y. C. Chuang, M. S. Molokeev, Z. Xia, *Adv. Funct. Mater.* **2021**, 32, 2103927.
- [19] J. Qiao, G. Zhou, Y. Zhou, Q. Zhang, Z. Xia, *Nat. Commun.* **2019**, 10, 5267.
